# Supplementary material for: Robust RNA-based in situ mutation detection delineates colorectal cancer subclonal evolution
Source: PubMed Central journal article supplement (PMC5722928; doi:10.1038/s41467-017-02295-5), 2017-12-08
Supplement: 41467_2017_2295_MOESM1_ESM.pdf [file 41467_2017_2295_MOESM1_ESM.pdf]

Supplementary Figure 1. Baker *et al*  
Validation of BaseScope probes in cell lines

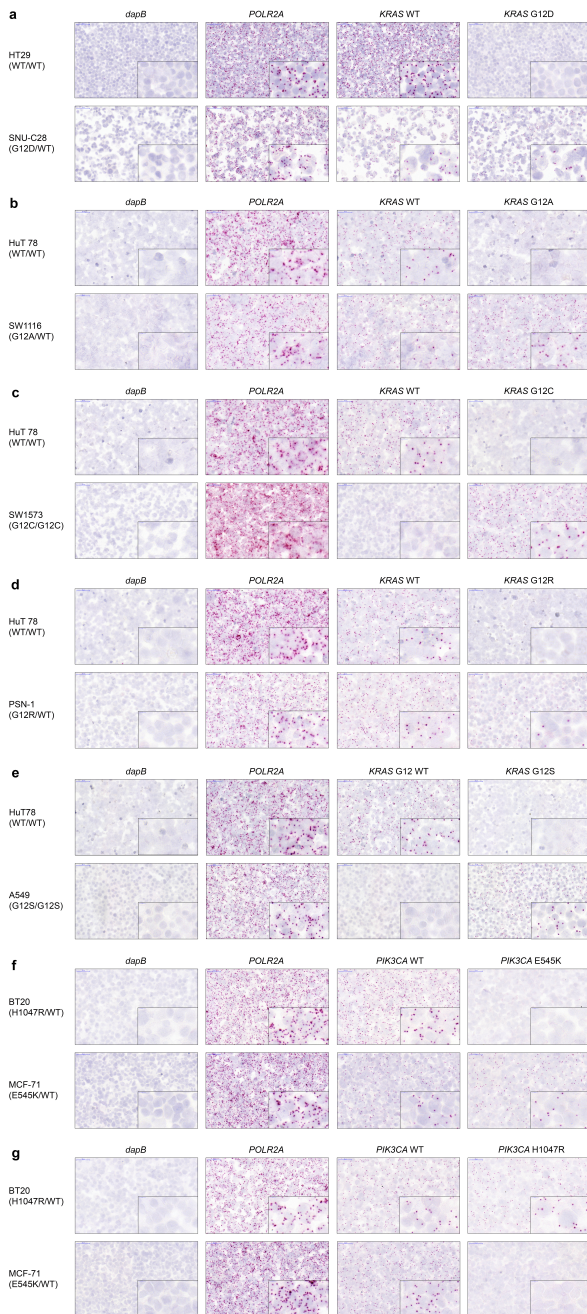

### Supplementary Figure 1 – Validation of BaseScope probes in cell lines

Representative images of the validation of the *KRAS* G12D probe set (a), *KRAS* G12A probe set (b), *KRAS* G12C probe set (c), *KRAS* G12R probe set (d), *KRAS* G12S probe set (e), *PIK3CA* E545K probe set (f) and *PIK3CA* H1047R probe set (g). In all cases a wild-type cell line and a heterozygous/homozygous mutant cell line are shown, with a negative control probe (*dapB*), a positive control probe (*POLR2A*), the wild-type probe and the mutant probe. Probe binding is visualized as punctate red dots. Scale bars represent 50 micron and 10 micron (inset).

Supplementary Figure 2. Baker *et al*  
Validation of BaseScope probes in tumors

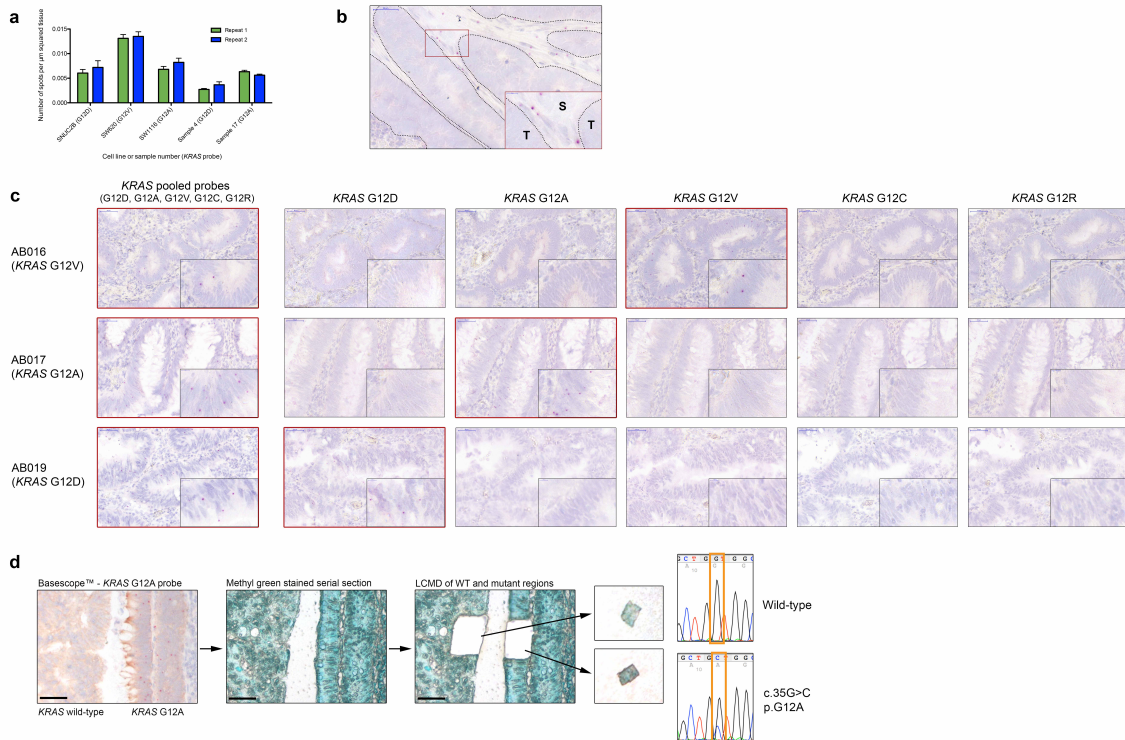

## Supplementary Figure 2 – Validation of BaseScope probes in tumors

**a.** Reproducibility of BaseScope signal quantification. Technical repeats were performed at least 3 months apart, and signal was quantified by counting positive spots in 5 representative fields of view. Bars represent the mean, and error bars represent the standard error of the mean. The difference between means of the two repeats is non-significant ( $P > 0.05$ ) in each case by the Mann-Whitney test.

**b.** Representative image showing binding of the *KRAS* WT probe only in stromal cells of a *KRAS* G12D homozygous mutant tumor (AB004). S = stroma, T = tumor.

**c.** Representative images of three cases with *de novo* *KRAS* mutations detected firstly with the pool of *KRAS* mutant probes (left column), and then tested with each of the 5 individual probes to detect which mutation is present (red box). The probes are entirely specific to the mutation that is present and there is no non-specific signal from the other *KRAS* mutant probes.

Scale bars in panels **b** and **c** represent 50 micron and 10 micron (inset).

**d.** Validation of the *KRAS* G12A mutation in sample AB017 by laser capture microdissection, DNA extraction and Sanger sequencing of *KRAS*. Scale bars represent 50 micron.

Supplementary Figure 3. Baker *et al*  
BaseScope can be combined with IHC or DNA-FISH

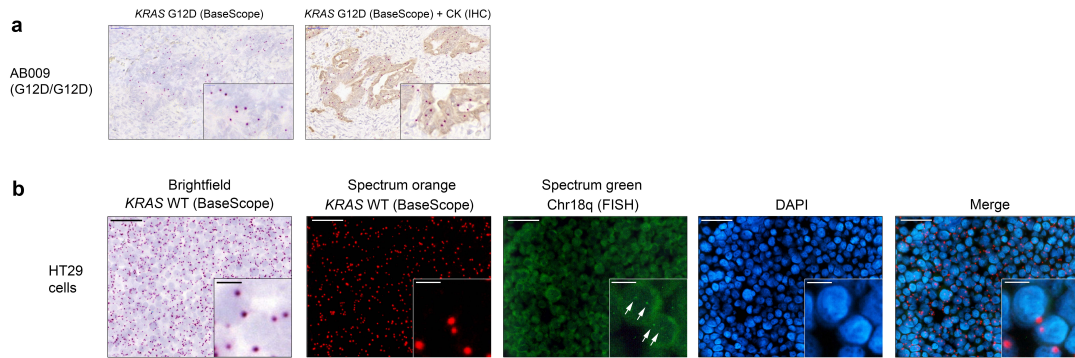

**Supplementary Figure 3 – BaseScope can be combined with IHC or DNA-FISH**

**a.** Representative images of *KRAS* G12D BaseScope signal alone (left panel) and with sequential IHC staining for pan-cytokeratin (CK, right panel).

**b.** Representative images of *KRAS* wild-type BaseScope signal (visible in brightfield and under the ‘Spectrum orange’ filter) combined with FISH for Chr18q (under the ‘Spectrum green’ filter, white arrows highlight location of the FISH signals). Scale bars in **a** and **b** represent 50 micron and 10 micron (inset).

Supplementary Figure 4. Baker *et al*  
BaseScope detection of CRC subclonal architecture

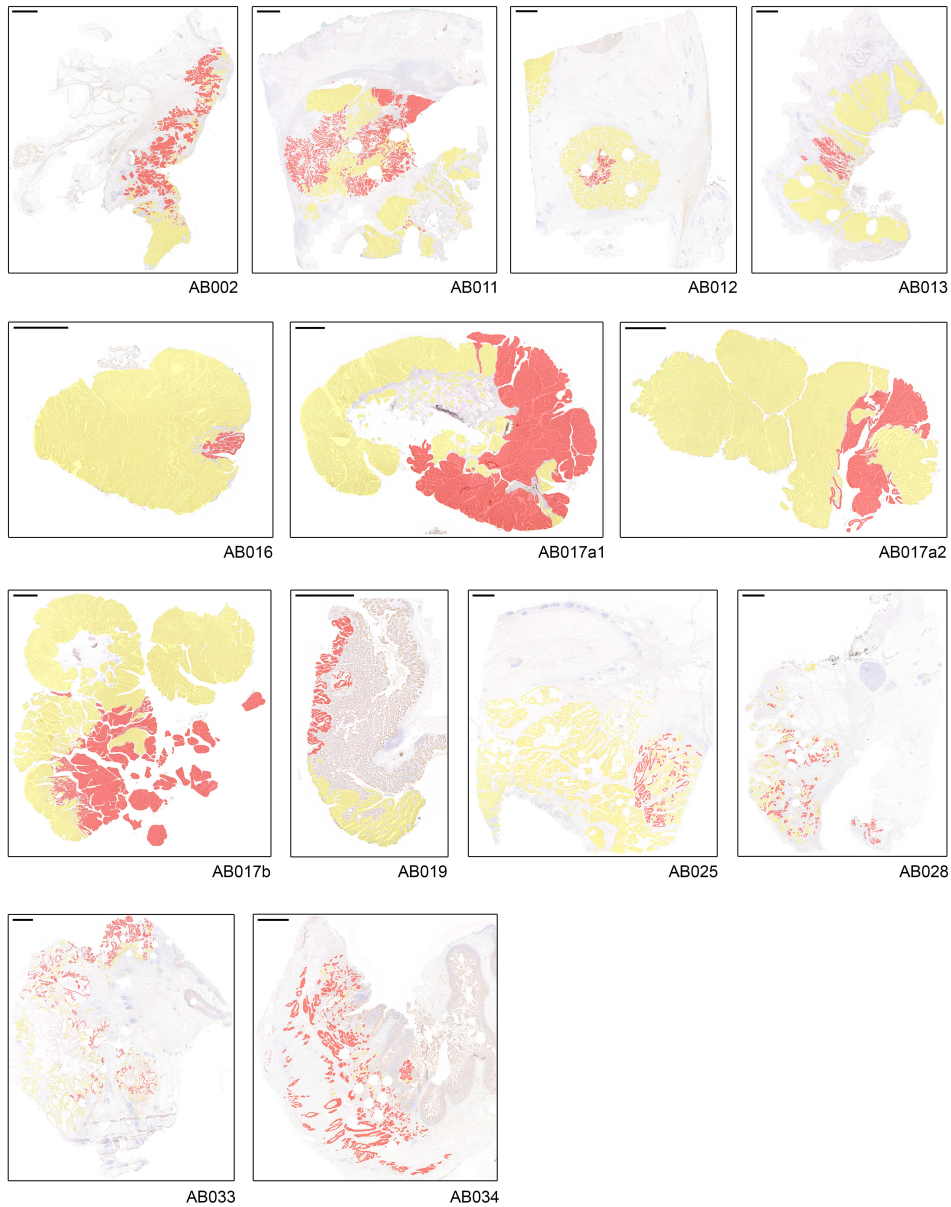

**Supplementary Figure 4 - BaseScope detection of CRC subclonal architecture**  
Topographical maps showing the spatial arrangement of wild-type (yellow) and mutant (red) regions within tumors containing subclonal mutations (n = 13). Scale bars: 2000 microns.

3D reconstruction shows intimate mixing of *KRAS* wild-type and mutant subclones.

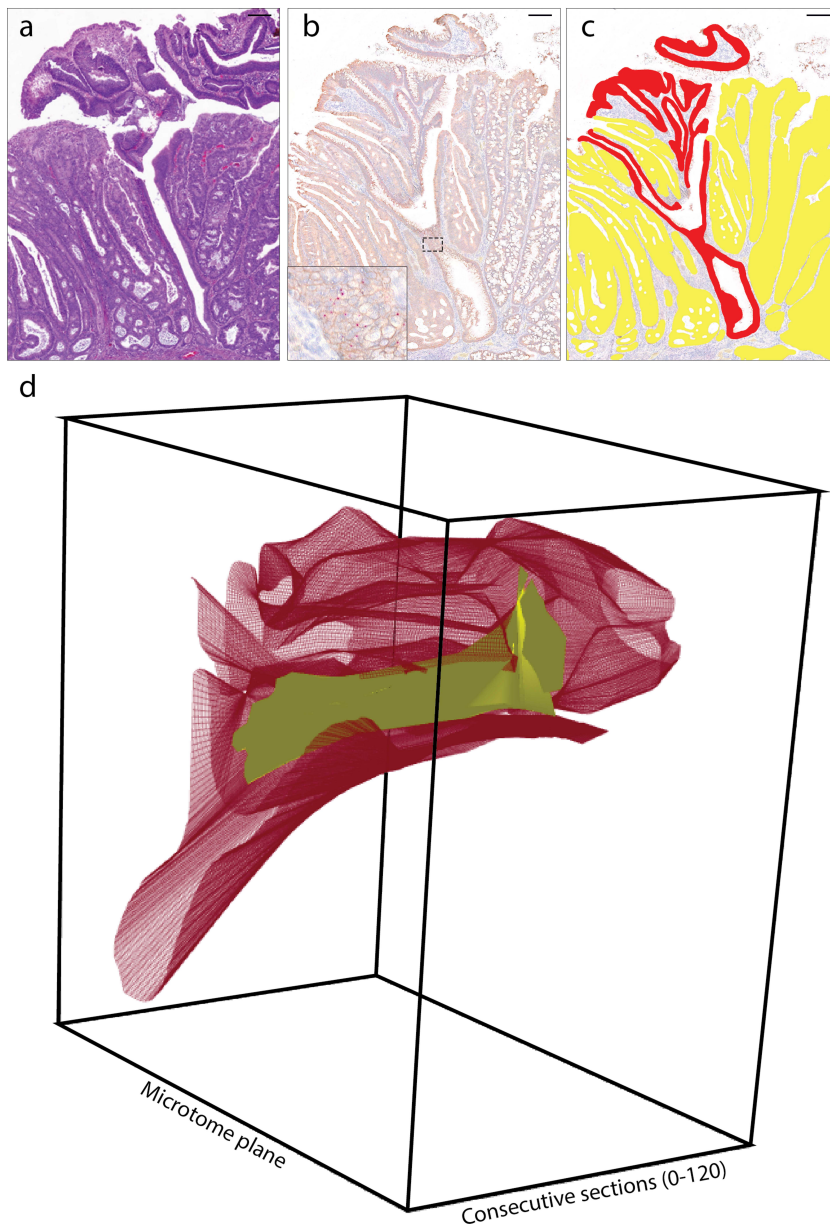

**Supplementary Figure 5 - 3D reconstruction shows intimate mixing of *KRAS* wild-type and mutant subclones.**

**a.** Overview H&E shows superficial of a moderately differentiated colorectal adenocarcinoma.

**b.** Basescope reveals a small *KRAS* mutant subclone.

**c.** *KRAS* mutant subclone shown in false color (red). The surrounding *KRAS* wild-type is shown in yellow. Note that the *KRAS* mutant subclone appears to enclose *KRAS* wild-type epithelium in the standard 2D section. Scale bars in panels **a-c** represent 200 micron.

**d.** 3D reconstruction reveals that this wild-type clone is enveloped in *KRAS* mutant epithelium, demonstrating complex spatial mixing behavior.

Supplementary Figure 6. Baker *et al*  
Phenotypic analysis of subclones

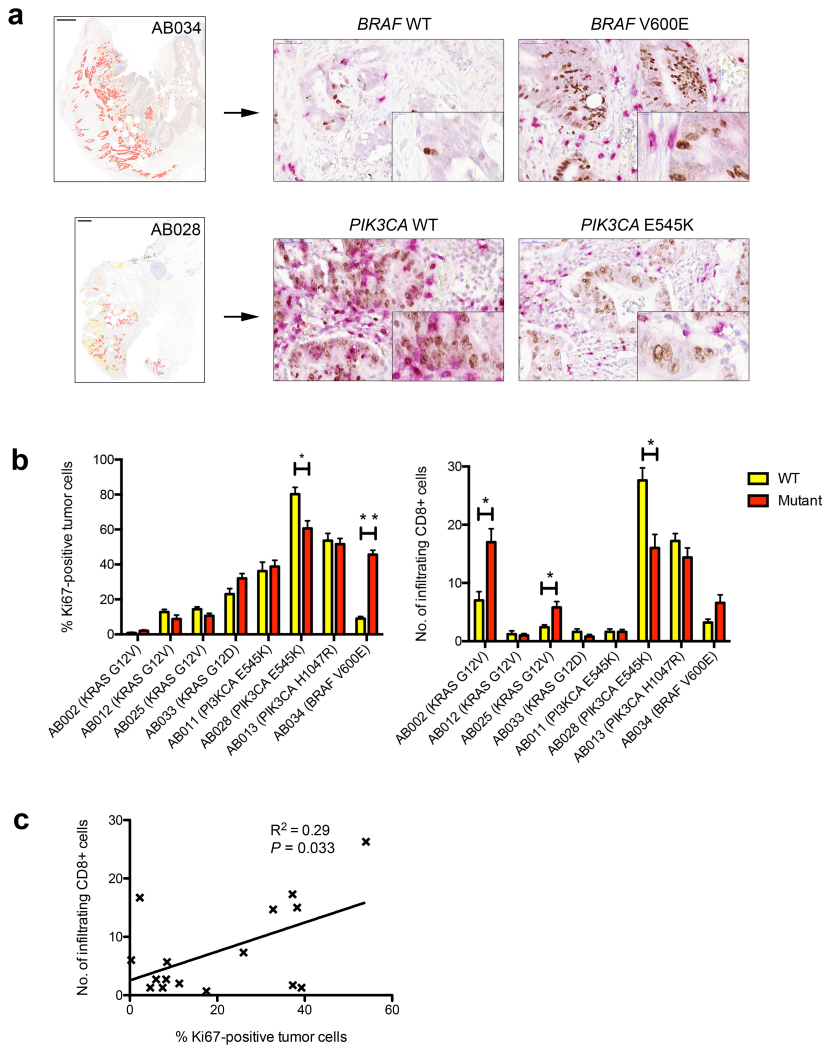

**Supplementary Figure 6 – Phenotypic analysis of subclones**

**a.** Representative images showing Ki67 (brown) and CD8 (red) dual-color IHC in two cases. Case AB034 shows higher Ki67 expression and more infiltrating CD8-positive T cells in the *BRAF* V600E mutant subclone. Case AB028 shows lower Ki67 expression and fewer infiltrating CD8-positive T cells in the *PIK3CA* E545K mutant subclone. Scale bars represent 2000 microns (maps), 50 micron and 10 micron (inset).

**b.** Quantification of Ki67 (left panel) and CD8 (right panel)-positive cells in wild-type and mutant regions of morphologically indistinguishable subclones (\* $P < 0.05$ , \*\* $P < 0.01$  by the Mann-Whitney test). Bars represent the mean, and error bars represent the standard error of the mean. For each of the wild-type and mutant subclones, 5 random areas comprising 100 tumor cells each were counted.

**c.** Weak correlation between the proportion of Ki67-positive tumor cells and the number of infiltrating CD8-positive cytotoxic T cells in subclonal CRCs ( $R^2 = 0.29$ ,  $P = 0.033$  by the F test).

## Supplementary Figure 7. Baker *et al* Analysis of clone mixing

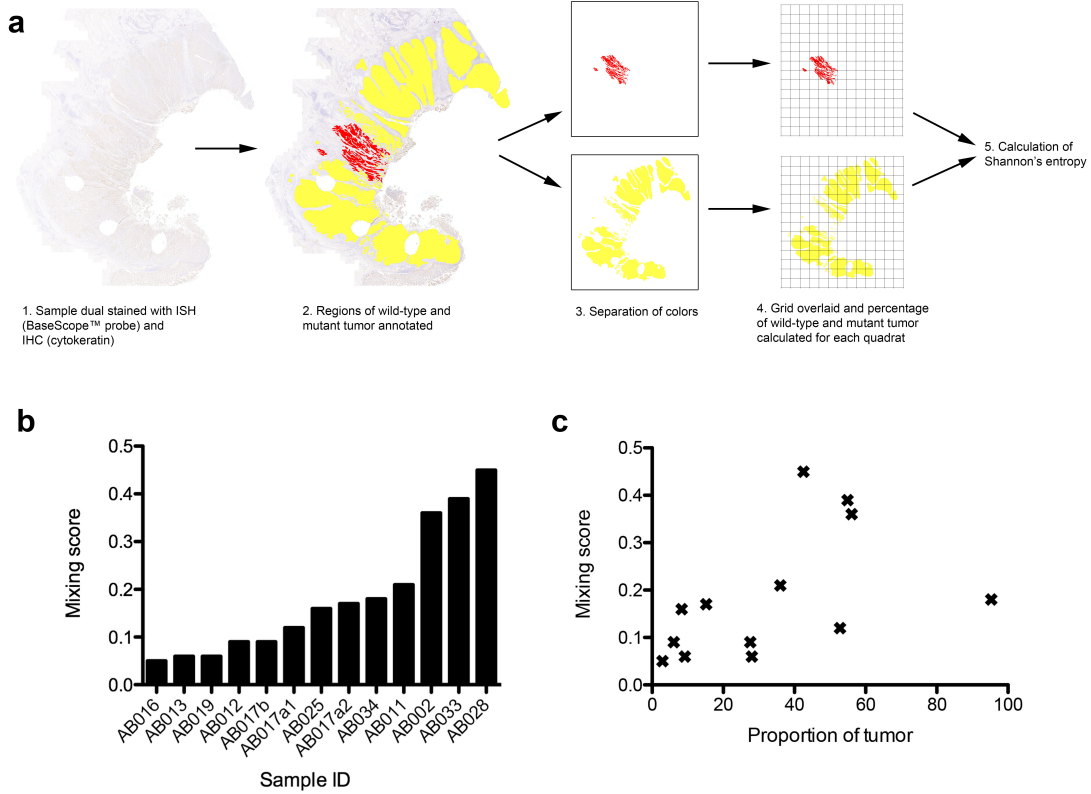

### Supplementary Figure 7 – Analysis of clone mixing

**a.** Schematic showing the methodology of calculating mixing scores (Shannon's entropy) from annotated tissue sections.

**b.** Mixing scores of each sample.

**c.** Relationship between the proportion of the lesion occupied by the mutant subclone and the mixing score.

Supplementary Figure 8. Baker *et al*  
Spatial modeling predicts the probabilities of observing cloning mixing

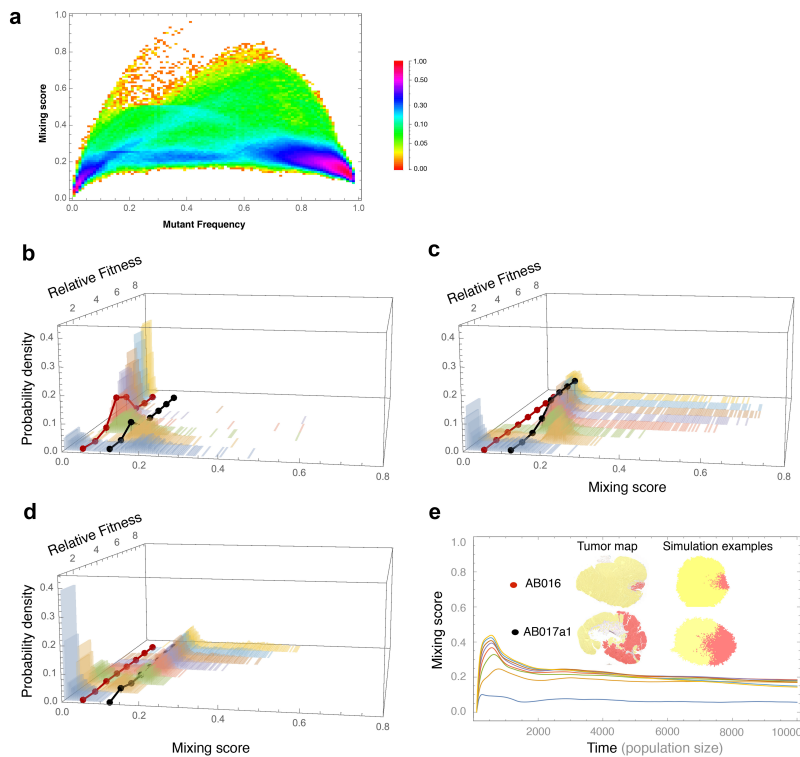

### Supplementary Figure 8 – Spatial modeling predicts the degree of clone intermixing

**a.** Data showing the nonlinear relationship between mutant frequency and mixing score. The mixing scores and mutant frequencies at the end of each simulation were recorded under various selection intensities. The color refers to the density of points in the figure, which has been scaled between 0 and 1. Based on all data points, we see that the mixing score increases when the mutant frequency increases to intermediate values and decreases again when the mutant reaches fixation and thus its frequency approaches to 1. All results are estimated over 1000 independent realizations; the initial mutant frequency is 0.01 and the tumor reaches a final size of  $10^4$ . Simulations assumed that the mutant arises at an intermediate time during tumor expansion.

**b-e.** Panels **b**, **c** and **d** show the probability density distributions of the spatial mixing (measured by Shannon scoring method with a value between 0 and 1) when the mutant arises (**a**) early, (**b**) intermediate and (**c**) late in tumor expansion. Red and black dots (joined by lines) are examples of probabilities to observe the empirically measured levels of mixing in two samples with relatively low (AB016) and high mixing (AB017a1) respectively. Panel **e** shows how the mixing level changes over time after the mutant appears – the mixing level increases to a transient high at intermediate times before declining as the mutant subclone either takes over the population or is lost. All distributions are results over 1000 independent realizations; in panels **b**, **c**, **d**, initial mutant frequencies are 0.1, 0.01, 0.001 respectively, and the distributions are estimated when the tumor reaches a final size of  $10^4$ .



Supplementary Figure 9. Baker *et al*  
Inference of mutant clone fitness and sampling time

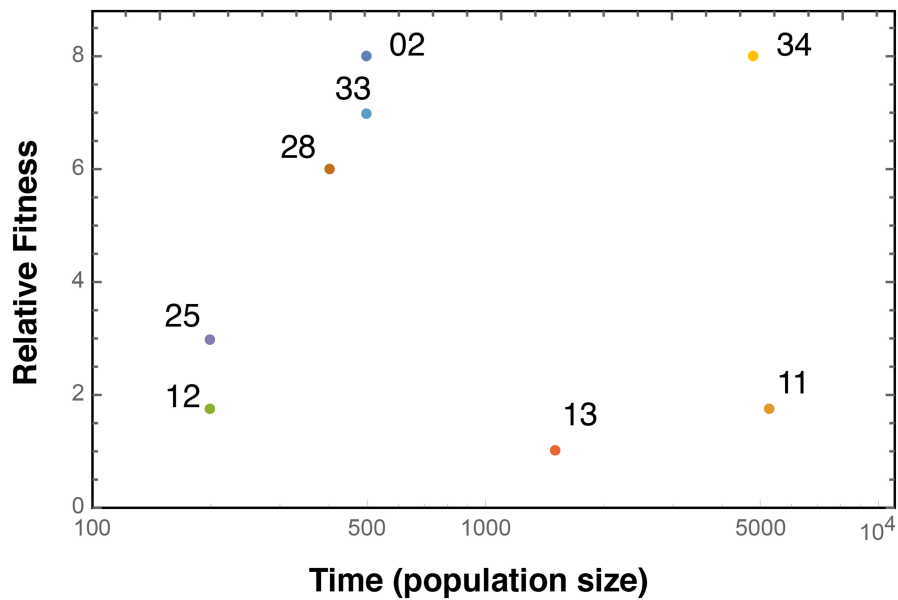

### Supplementary Figure 9 – Inference of mutant clone fitness and relative tumor age

Maximum posterior probabilities of subclone selection intensity and age of the CRC (time of surgery relative to tumor initiation) for each case. Samples with low mutant frequency and low subclonal mixing (e.g. sample AB025, AB012, AB013) were best explained if the subclone experienced no or weak selection intensity, whereas samples with intermediate mutant frequency and mixing (e.g. sample AB002, AB028, AB033) were most likely to be observed if the subclone experienced intermediate/high selection intensity and was sampled in an intermediate time after the mutant arose. Only if the selection intensity is strong and the tumor is sampled late after the mutant arose was a high mutant frequency with low mixing (e.g. sample AB034) likely. All results are estimated over 1000 independent realizations; the initial mutant frequency is 0.01 and the tumor reaches a final size of 10<sup>4</sup>. Simulations assumed that the mutant arises at an intermediate time during tumor expansion.

Supplementary Figure 10. Baker *et al*  
 Comparison of 'cell death' and 'pushing' model formulations

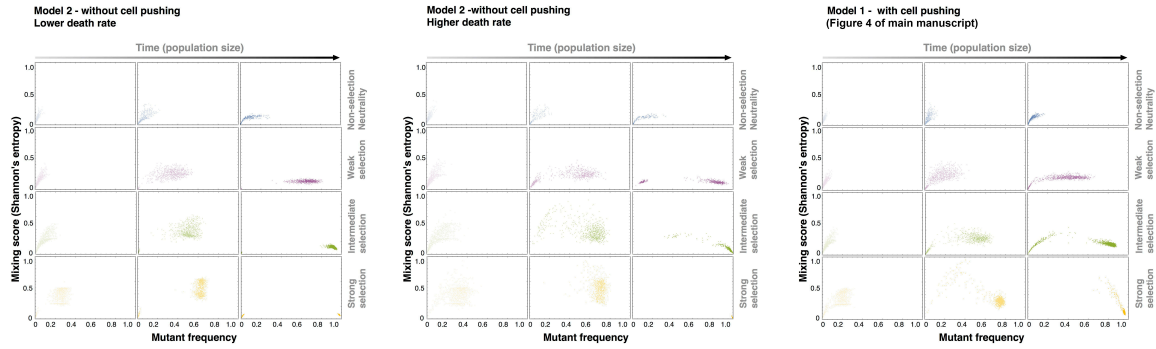

### Supplementary Figure 10 – Comparison of 'cell death' and 'pushing' model formulations

The left and middle panels show the results of an alternative model where daughter cells can only divide into neighboring empty spaces, without pushing. In this model, cells die with a fixed rate and so create empty spaces inside the tumor. The right panels show the results of our spatial model with cell pushing during cell division. The qualitative patterns of clone spread and mixing are the same in both models. Under neutral or near-neutral selection (the first row of all panels), mixing and mutant frequency are low irrespective of when the tumor is sampled. When selection intensity is strong, a temporal transit from low mixing to high mixing and then to low mixing again is observed. A high death rate (the middle panel) produces more empty spaces in the population, and mutants with fitness advantages are more likely to reach fixation than in the 'pushing model'. (Each panel shows results from 1000 independent realizations; relative growth ratios of the mutant to wild type are 1, 1.75, 3.0, 8.0 for neutral, weak, intermediate, and strong selection respectively; the initial mutant frequency is 0.01 and the final tumor size is  $10^4$ ; death rate is 0.1 and 0.5 for the left and middle panels.)

**Supplementary Table 1 - Details of 1ZZ BaseScope probes**

| <b>Probe Type</b>                | <b>Target amino acid variant</b> | <b>Target nucleotide variant</b> | <b>Notes</b>                     |
|----------------------------------|----------------------------------|----------------------------------|----------------------------------|
| Negative control - <i>dapB</i>   | N/A                              | N/A                              |                                  |
| Positive control - <i>POLR2A</i> | N/A                              | N/A                              |                                  |
| BRAF V600 WT                     | N/A                              | N/A                              |                                  |
| BRAF V600 Mutant                 | p.V600E                          | c.1799T>A                        |                                  |
| KRAS G12 WT (1)                  | N/A                              | N/A                              | Control probe for G12D           |
| KRAS G12 Mutant                  | p.G12D                           | c.35G>A                          |                                  |
| KRAS G12 WT (2)                  | N/A                              | N/A                              | Control probe for G12A/G12V      |
| KRAS G12 Mutant                  | p.G12V                           | c.35G>T                          |                                  |
| KRAS G12 Mutant                  | p.G12A                           | c.35G>C                          |                                  |
| KRAS G12 WT (3)                  | N/A                              | N/A                              | Control probe for G12C/G12R/G12S |
| KRAS G12 Mutant                  | p.G12C                           | c.34G>T                          |                                  |
| KRAS G12 Mutant                  | p.G12R                           | c.34G>C                          |                                  |
| KRAS G12 Mutant                  | p.G12S                           | c.34G>A                          |                                  |
| PIK3CA E545 WT                   | N/A                              | N/A                              |                                  |
| PIK3CA E545 Mutant               | p.E545K                          | c.1633G>A                        |                                  |
| PIK3CA H1047 WT                  | N/A                              | N/A                              |                                  |
| PIK3CA H1047 Mutant              | p.H1047R                         | c.3140A>G                        |                                  |

**Supplementary Table 2 – Validation of 1ZZ probes in cell lines**

| Probe set            | Cell line | Mutational status at site of interest | <i>dapB</i> positive cells (%) | <i>POLR2A</i> positive cells (%) | WT probe positive cells (%) | Mutant probe positive cells (%) |
|----------------------|-----------|---------------------------------------|--------------------------------|----------------------------------|-----------------------------|---------------------------------|
| <i>BRAF</i> V600E    | CHL-1     | Wild-type                             | 1/180<br>(0.6)                 | 214/218<br>(98.2)                | 122/209<br>(58.4)           | 0/194<br>(0.0)                  |
|                      | SK-MEL-28 | Homozygous mutant                     | 3/174<br>(1.7)                 | 174/176<br>(98.9)                | 1/172<br>(0.6)              | 185/193<br>(95.6)               |
| <i>KRAS</i> G12D     | HT29      | Wild-type                             | 5/572<br>(0.9)                 | 581/593<br>(98.0)                | 561/590<br>(95.1)           | 0/564<br>(0.0)                  |
|                      | SNU-C2B   | Heterozygous mutant                   | 0/288<br>(0.0)                 | 273/277<br>(98.6)                | 192/274<br>(70.1)           | 167/294<br>(56.8)               |
| <i>KRAS</i> G12R     | HuT 78    | Wild-type                             | 1/474<br>(0.2)                 | 492/494<br>(99.6)                | 315/504<br>(62.5)           | 1/511<br>(0.2)                  |
|                      | PSN-1     | Heterozygous mutant                   | 0/344<br>(0.0)                 | 338/346<br>(97.7)                | 297/373<br>(79.6)           | 51/312<br>(16.3)                |
| <i>KRAS</i> G12V     | HT29      | Wild-type                             | 2/521<br>(0.4)                 | 502/504<br>(99.6)                | 395/458<br>(86.2)           | 0/543<br>(0.0)                  |
|                      | SW620     | Homozygous mutant                     | 1/620<br>(0.2)                 | 573/573<br>(100.0)               | 1/635<br>(0.2)              | 377/550<br>(68.5)               |
| <i>KRAS</i> G12A     | HuT 78    | Wild-type                             | 1/427<br>(0.2)                 | 401/405<br>(99.0)                | 257/419<br>(61.3)           | 0/403<br>(0.0)                  |
|                      | SW1116    | Heterozygous mutant                   | 1/499<br>(0.2)                 | 381/387<br>(98.4)                | 223/419<br>(53.2)           | 272/427<br>(63.7)               |
| <i>KRAS</i> G12C     | HuT 78    | Wild-type                             | 1/409<br>(0.2)                 | 411/414<br>(99.3)                | 318/455<br>(69.9)           | 1/426<br>(0.2)                  |
|                      | SW1573    | Homozygous mutant                     | 0/314<br>(0.0)                 | 354/354<br>(100.0)               | 0/376<br>(0.0)              | 330/366<br>(90.2)               |
| <i>KRAS</i> G12S     | HuT 78    | Wild-type                             | 0/405<br>(0.0)                 | 425/429<br>(99.1)                | 291/423<br>(68.8)           | 0/441<br>(0.0)                  |
|                      | A549      | Homozygous mutant                     | 0/220<br>(0.0)                 | 232/237<br>(97.9)                | 0/243<br>(0.0)              | 233/265<br>(87.9)               |
| <i>PIK3CA</i> E545K  | BT20      | Wild-type                             | 0/367<br>(0.0)                 | 328/328<br>(100.0)               | 366/376<br>(97.3)           | 1/342<br>(0.3)                  |
|                      | MCF-71    | Heterozygous mutant                   | 1/389<br>(0.3)                 | 401/403<br>(99.5)                | 243/410<br>(59.3)           | 179/322<br>(55.6)               |
| <i>PIK3CA</i> H1057R | MCF-71    | Wild-type                             | 1/347<br>(0.3)                 | 383/385<br>(99.5)                | 393/422<br>(93.1)           | 0/377<br>(0.0)                  |
|                      | BT20      | Heterozygous mutant                   | 0/350<br>(0.0)                 | 319/319<br>(100.0)               | 264/302<br>(87.4)           | 176/293<br>(60.1)               |

**Supplementary Table 3 – Details of patient samples**

| Sample reference | Tumor type | Tumor stage/MSI status | Age of block (years) | Mutational status by sequencing (NGS/Sanger) | Mutational status by BaseScope | Subclonal map |
|------------------|------------|------------------------|----------------------|----------------------------------------------|--------------------------------|---------------|
| AB001            | Colorectal | pT4                    | 2                    | KRAS WT                                      | KRAS WT*                       |               |
| AB002a           | Colorectal | pT3/MSI+               | 3                    | KRAS G12V                                    | KRAS G12V                      |               |
| AB002b           | Colorectal | pT3/MSI+               | 3                    | KRAS G12V                                    | KRAS G12V                      | Yes           |
| AB003            | Colorectal | pT4                    | 2                    | KRAS G13D, BRAF WT                           | BRAF WT                        |               |
| AB004            | Colorectal | pT4                    | 2                    | KRAS G12D, BRAF WT                           | KRAS G12D, BRAF WT             |               |
| AB005            | Colorectal | pT2                    | 3                    | KRAS G12D, BRAF WT                           | KRAS G12D, BRAF WT             |               |
| AB006            | Colorectal | pT4                    | 2                    | BRAF V600E                                   | BRAF V600E                     |               |
| AB007            | Colorectal | pT4                    | 2                    | BRAF V600E                                   | BRAF V600E                     |               |
| AB008            | Colorectal | pT4                    | 0                    | BRAF V600E                                   | Unknown                        |               |
| AB009            | Colorectal | Unknown                | 8                    | KRAS G12D                                    | KRAS G12D                      |               |
| AB010            | Colorectal | Unknown                | 11                   | KRAS G12C                                    | KRAS G12C                      |               |
| AB011            | Colorectal | Unknown                | 7                    | PIK3CA E545K                                 | PIK3CA E545K                   | Yes           |
| AB012            | Colorectal | Unknown                | 10                   | KRAS G12V                                    | KRAS G12V                      | Yes           |
| AB013            | Colorectal | MSI+                   | 9                    | PIK3CA H1047R                                | PIK3CA H1047R                  | Yes           |
| AB014            | Colorectal | Unknown                | 9                    | PIK3CA E545K                                 | PIK3CA E545K                   |               |
| AB015            | Colorectal | pT1                    | 8                    | BRAF V600E                                   | BRAF V600E                     |               |
| AB016            | Colorectal | pT1 (Ca-in-ad)         | 3                    | KRAS WT                                      | KRAS G12V                      | Yes           |
| AB017a           | Colorectal | pT1 (Ca-in-ad)         | 3                    | KRAS WT                                      | KRAS G12A                      | Yes (x2)      |
| AB017b           | Colorectal | pT1 (Ca-in-ad)         | 3                    | KRAS WT                                      | KRAS G12A                      | Yes           |
| AB017c           | Colorectal | pT1 (Ca-in-ad)         | 3                    | KRAS WT                                      | KRAS WT*                       |               |
| AB018            | Colorectal | pT1 (Ca-in-ad)         | 2                    | KRAS WT                                      | KRAS WT*                       |               |
| AB019a           | Colorectal | pT1 (Ca-in-ad)         | 4                    | KRAS WT                                      | KRAS G12D                      | Yes           |
| AB019b           | Colorectal | pT1 (Ca-in-ad)         | 4                    | KRAS WT                                      | KRAS WT*                       |               |
| AB019c           | Colorectal | pT1 (Ca-in-ad)         | 4                    | KRAS WT                                      | KRAS WT*                       |               |
| AB020            | Colorectal | pT1 (Ca-in-ad)         | 2                    | KRAS WT                                      | KRAS WT*                       |               |
| AB021            | Colorectal | pT1 (Ca-in-ad)         | 2                    | KRAS WT                                      | KRAS WT*                       |               |
| AB022            | Colorectal | pT1 (Ca-in-ad)         | 2                    | KRAS WT                                      | KRAS WT*                       |               |
| AB023            | Colorectal | pT1 (Ca-in-ad)         | 2                    | KRAS WT                                      | KRAS WT*                       |               |
| AB024            | Colorectal | pT1 (Ca-in-ad)         | 3                    | KRAS WT                                      | KRAS WT*                       |               |
| AB025            | Colorectal | Unknown                | 10                   | KRAS G12V                                    | KRAS G12V                      | Yes           |
| AB026            | Colorectal | Unknown                | 9                    | KRAS G12V                                    | KRAS G12V                      |               |
| AB027            | Colorectal | Unknown                | 15                   | PIK3CA E545K                                 | PIK3CA E545K                   |               |
| AB028            | Colorectal | Unknown                | 14                   | PIK3CA E545K                                 | PIK3CA E545K                   | Yes           |
| AB029            | Colorectal | Unknown                | 20                   | KRAS G12D                                    | KRAS G12D                      |               |
| AB030            | Colorectal | Unknown                | 14                   | BRAF V600E                                   | BRAF V600E                     |               |
| AB031            | Colorectal | Unknown                | 14                   | PIK3CA E545K                                 | PIK3CA E545K                   |               |
| AB032            | Colorectal | Unknown                | 13                   | KRAS G12C                                    | KRAS G12C                      |               |
| AB033            | Colorectal | Unknown                | 15                   | KRAS G12D                                    | KRAS G12D                      | Yes           |
| AB034            | Colorectal | Unknown                | 16                   | BRAF V600E                                   | BRAF V600E                     | Yes           |
| AB035            | Colorectal | Unknown                | 15                   | KRAS G12C                                    | KRAS G12C                      |               |
| AB036            | Colorectal | Unknown                | 14                   | BRAF WT                                      | BRAF WT                        |               |
| AB037            | Colorectal | Unknown                | 16                   | KRAS WT                                      | KRAS WT*                       |               |
| AB038            | Melanoma   | Unknown                | 0                    | BRAF V600E                                   | BRAF V600E                     |               |
| AB039            | Colorectal | pT1 (Ca-in-ad)         | 2                    | KRAS WT                                      | KRAS WT*                       |               |
| AB040            | Colorectal | pT1 (Ca-in-ad)         | 2                    | KRAS WT                                      | KRAS WT*                       |               |
| AB041            | Colorectal | pT1 (Ca-in-ad)         | 3                    | KRAS WT                                      | KRAS WT*                       |               |
| AB042            | Colorectal | pT1 (Ca-in-ad)         | 2                    | KRAS WT                                      | KRAS WT*                       |               |
| AB043            | Colorectal | pT1 (Ca-in-ad)         | 4                    | KRAS WT                                      | KRAS WT*                       |               |
| AB044            | Colorectal | pT1 (Ca-in-ad)         | 4                    | KRAS WT                                      | KRAS WT*                       |               |
| AB045            | Colorectal | pT1 (Ca-in-ad)         | 4                    | KRAS WT                                      | KRAS WT*                       |               |
| AB046            | Colorectal | pT1 (Ca-in-ad)         | 2                    | KRAS WT                                      | KRAS WT*                       |               |

KRAS WT\* = a mutation was not detected using the probes G12D, G12V, G12A, G12C, G12R, G12S;  
MSI = microsatellite instable.

**Supplementary Table 4 - Validation of 1ZZ probes in human tumors**

| Sample reference | Tumor type | Mutational status at site of interest | <i>dapB</i> positive cells (%) | <i>POLR2A</i> positive cells (%) | <i>KRAS</i> WT positive cells (%) | <i>KRAS</i> G12D positive cells (%) | <i>BRAF</i> WT positive cells (%) | <i>BRAF</i> V600E positive cells (%) |
|------------------|------------|---------------------------------------|--------------------------------|----------------------------------|-----------------------------------|-------------------------------------|-----------------------------------|--------------------------------------|
| AB001            | CRC        | KRAS WT<br>BRAF WT                    | 0/250<br>(0.0)                 | 127/251<br>(50.6)                | 143/251<br>(57.0)                 | 1/236<br>(0.4)                      | ND                                | ND                                   |
| AB003            | CRC        | KRAS G13D<br>BRAF WT                  | 1/197<br>(0.5)                 | 83/217<br>(38.2)                 | 14/202<br>(6.9)                   | 0/228<br>(0.0)                      | ND                                | ND                                   |
| AB004            | CRC        | KRAS G12D<br>BRAF WT                  | 0/312<br>(0.0)                 | 262/294<br>(89.1)                | 0/286<br>(0.0)                    | 44/265<br>(16.6)                    | 139/305<br>(45.6)                 | 0/308<br>(0.0)                       |
| AB005            | CRC        | KRAS G12D<br>BRAF WT                  | ND                             | ND                               | 50/316<br>(15.8)                  | 125/279<br>(44.8)                   | ND                                | ND                                   |
| AB007            | CRC        | KRAS unknown<br>BRAF V600E            | 0/174<br>(0.0)                 | 227/264<br>(86.0)                | ND                                | ND                                  | 25/220<br>(11.4)                  | 29/222<br>(13.1)                     |
| AB038            | Melanoma   | KRAS unknown<br>BRAF V600E            | 1/269<br>(0.4)                 | ND                               | ND                                | ND                                  | 68/269<br>(25.3)                  | 56/293<br>(19.1)                     |

An average of 238 (+/- 30) tumor cells over three fields of view were counted for each probe in each tumor. ND = not done.

**Supplementary Table 5 - Details of subclonal maps**

| <b>Sample</b> | <b>Mutation</b> | <b>Percentage of tumor mutant</b> | <b>Shannon's entropy</b> | <b>Sample Type</b> |
|---------------|-----------------|-----------------------------------|--------------------------|--------------------|
| AB002         | KRAS G12V       | 56.1                              | 0.36                     | CRC                |
| AB011         | PIK3CA E545K    | 36.0                              | 0.21                     | CRC                |
| AB012         | KRAS G12V       | 6.1                               | 0.09                     | CRC                |
| AB013         | PIK3CA H1047R   | 9.2                               | 0.06                     | CRC                |
| AB016         | KRAS G12V       | 2.9                               | 0.05                     | Ca-in-ad           |
| AB017a1       | KRAS G12A       | 52.8                              | 0.12                     | Ca-in-ad           |
| AB017a2       | KRAS G12A       | 15.2                              | 0.17                     | Ca-in-ad           |
| AB017b        | KRAS G12A       | 27.6                              | 0.09                     | Ca-in-ad           |
| AB019         | KRAS G12D       | 28.0                              | 0.06                     | Ca-in-ad           |
| AB025         | KRAS G12V       | 8.3                               | 0.16                     | CRC                |
| AB028         | PIK3CA E545K    | 42.5                              | 0.45                     | CRC                |
| AB033         | KRAS G12D       | 54.9                              | 0.39                     | CRC                |
| AB034         | BRAF V600E      | 95.3                              | 0.18                     | CRC                |
