# Supplementary material for: Robust RNA-based in situ mutation detection delineates colorectal cancer subclonal evolution
Source: PubMed Central journal article supplement (PMC5722928; doi:10.1038/s41467-017-02295-5), 2017-12-08
Supplement: 41467_2017_2295_MOESM3_ESM.pdf [file 41467_2017_2295_MOESM3_ESM.pdf]

## Description of Supplementary Files

File Name: Supplementary Movie 1

Description: **3D reconstruction of clone mixing**. Movie showing the complex and intimate mixing of a mutant clone (red) and a wild type clone (yellow), reconstructed from serial BaseScope-stained sections.
